# Supplementary material for: SILCs in oxidative desulfurization: effect of support and heteropolyanion
Source: Royal Society of Chemistry journal article supplement (doi:10.1039/c9nj05403k), 2020-01-01
Supplement: c9nj05403k1.pdf [file c9nj05403k1.pdf]

## Electronic supplementary materials

### Support effect in oxidative desulfurization by SILCs with Mo- and W-heteropolyanions

A. G. Ali-Zade<sup>a</sup>, A. K. Buryak<sup>b</sup>, V. M. Zelikman<sup>a</sup>, K.V. Oskolok<sup>a</sup>, I. G. Tarkhanova<sup>a\*</sup>

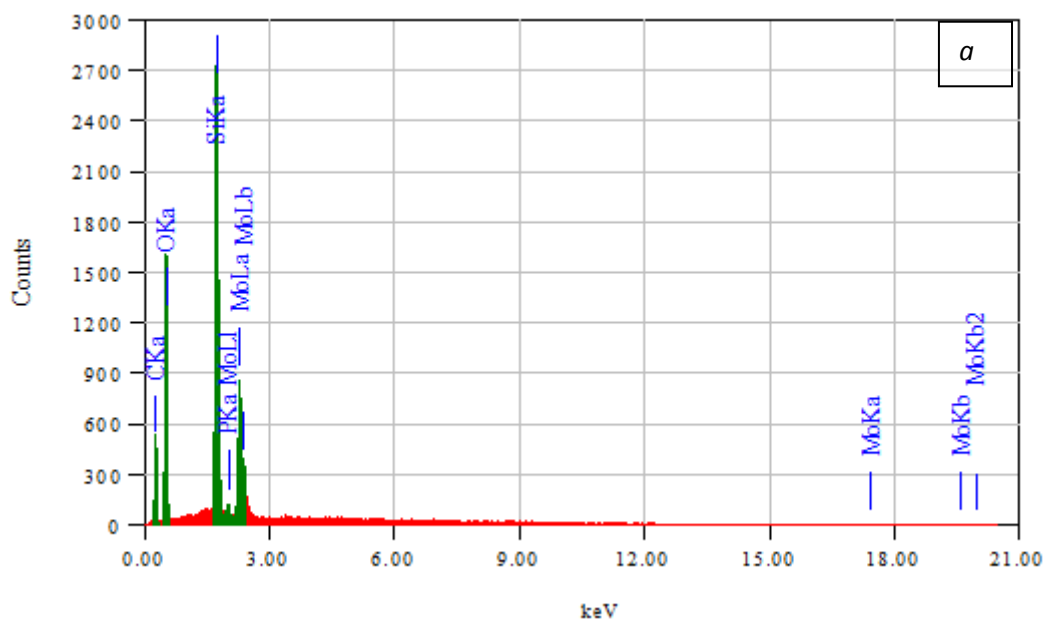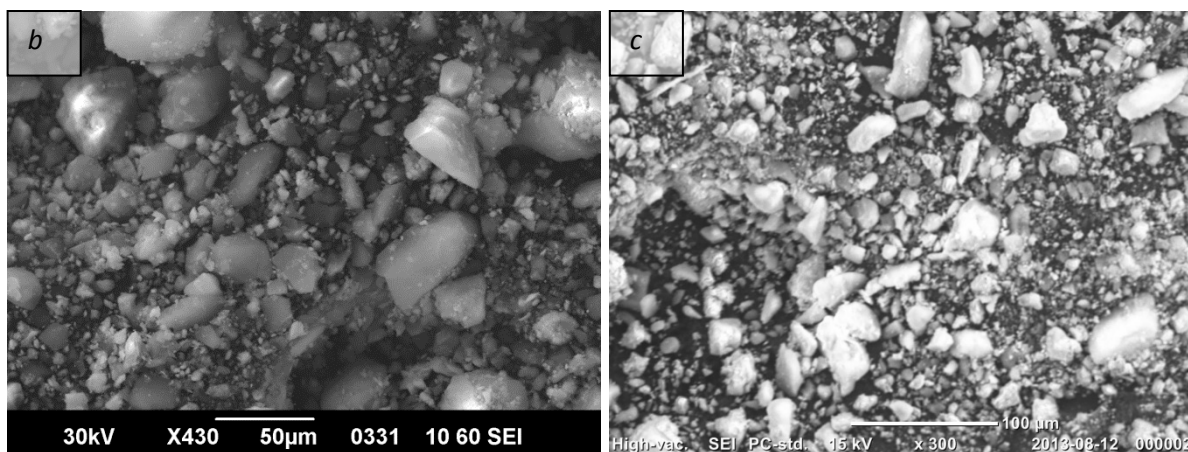

Figure S1. SEM-EDA analysis spectra (a) and images (b,c) for PMo-Silochrome

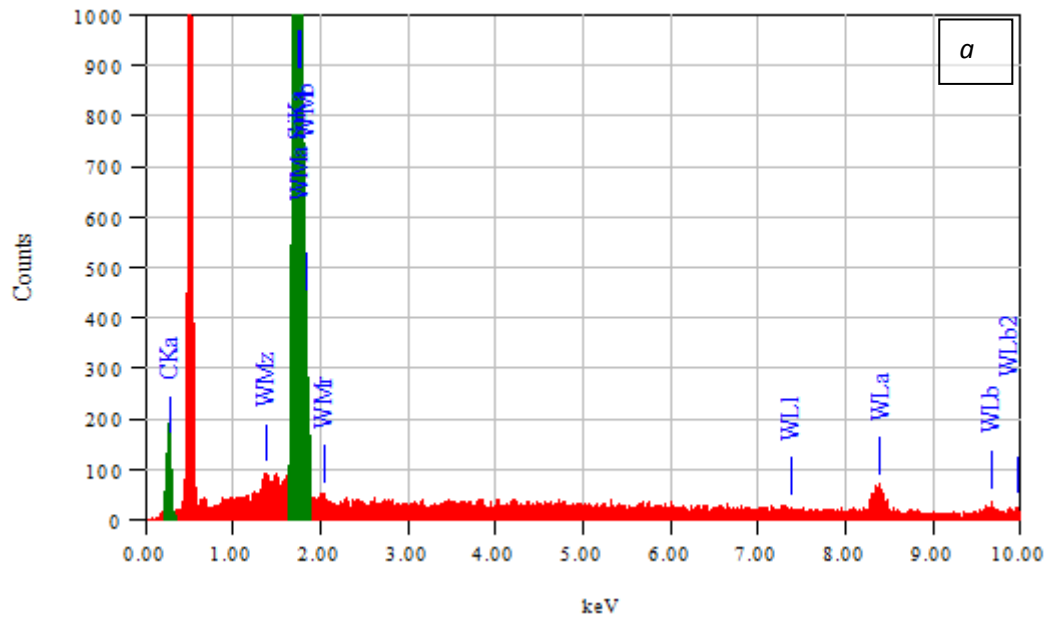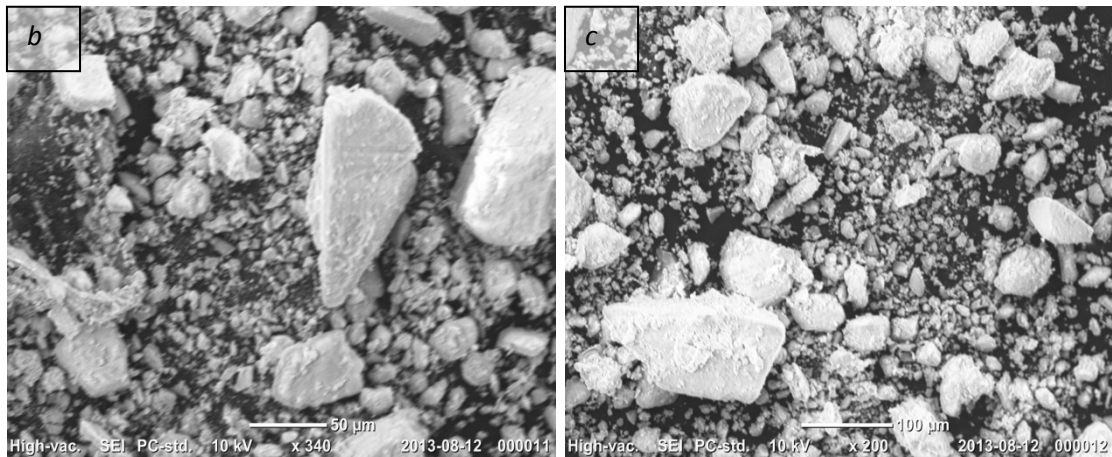

**Figure S2. SEM-EDA analysis spectra (a) and images (b,c) for PW-Silochrome**

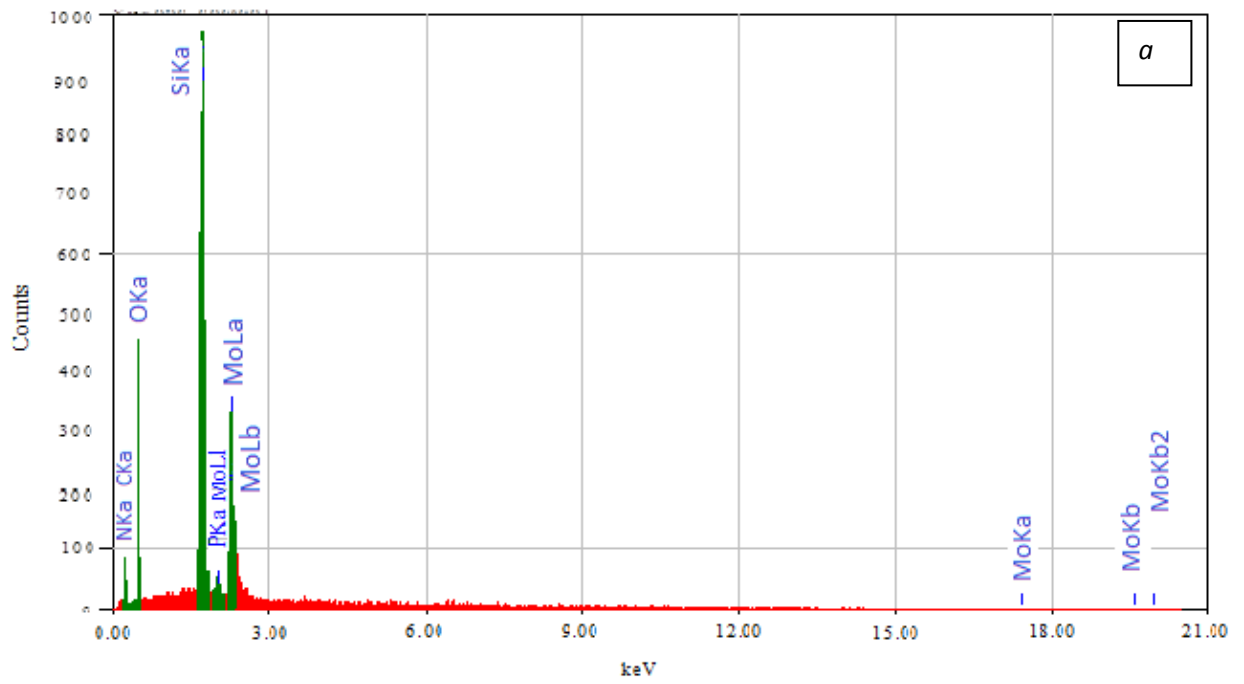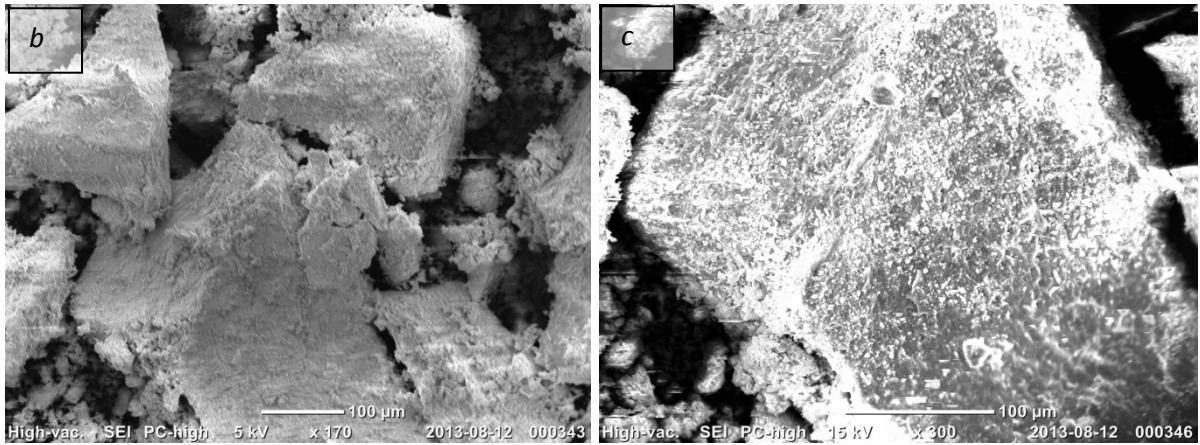

**Figure S3. SEM-EDA analysis spectra (a) and images (b,c) for PMo- Perlkat**

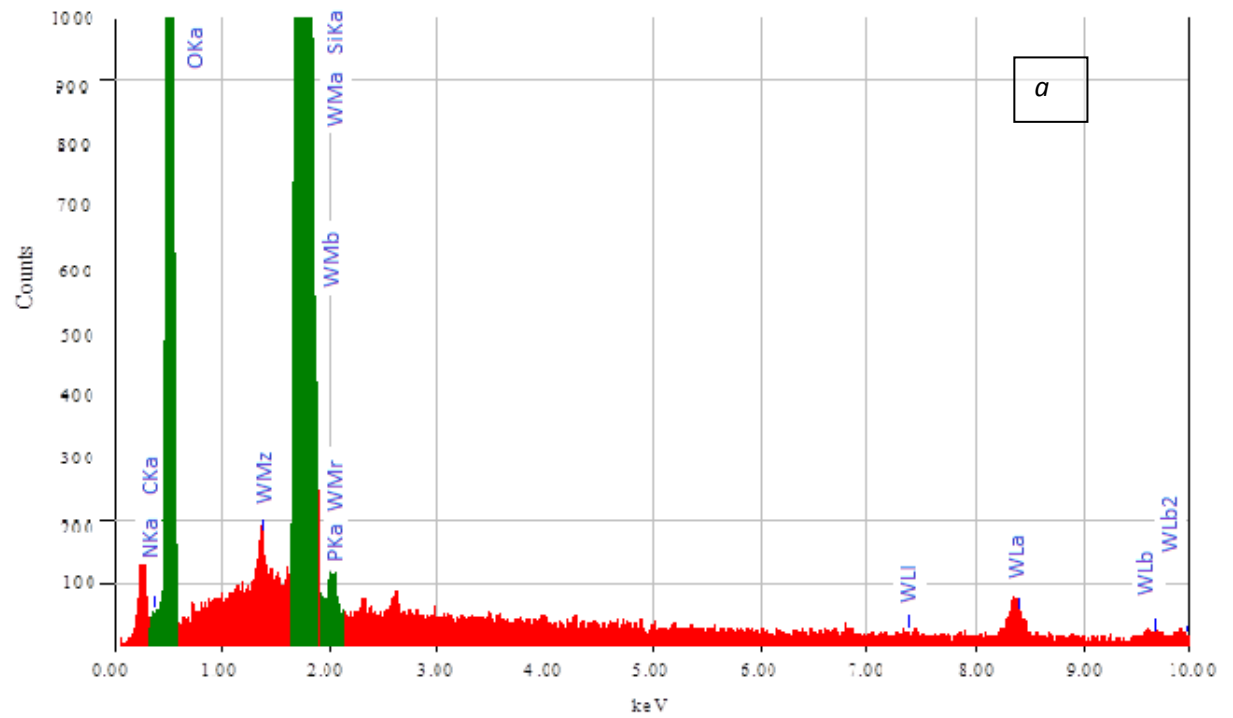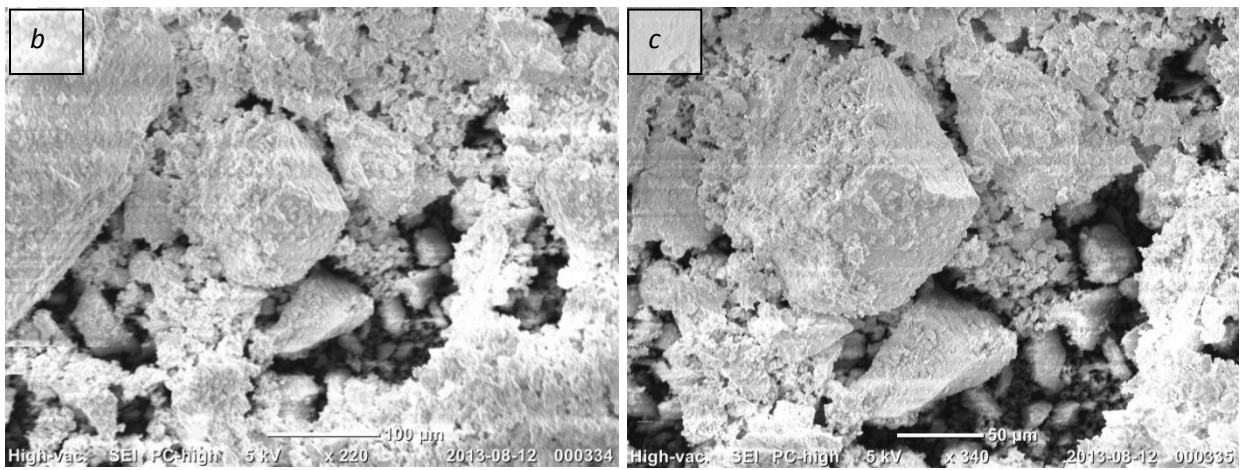

**Figure S4. SEM-EDA analysis spectra (a) and images (b,c) for PW- Perlkat**

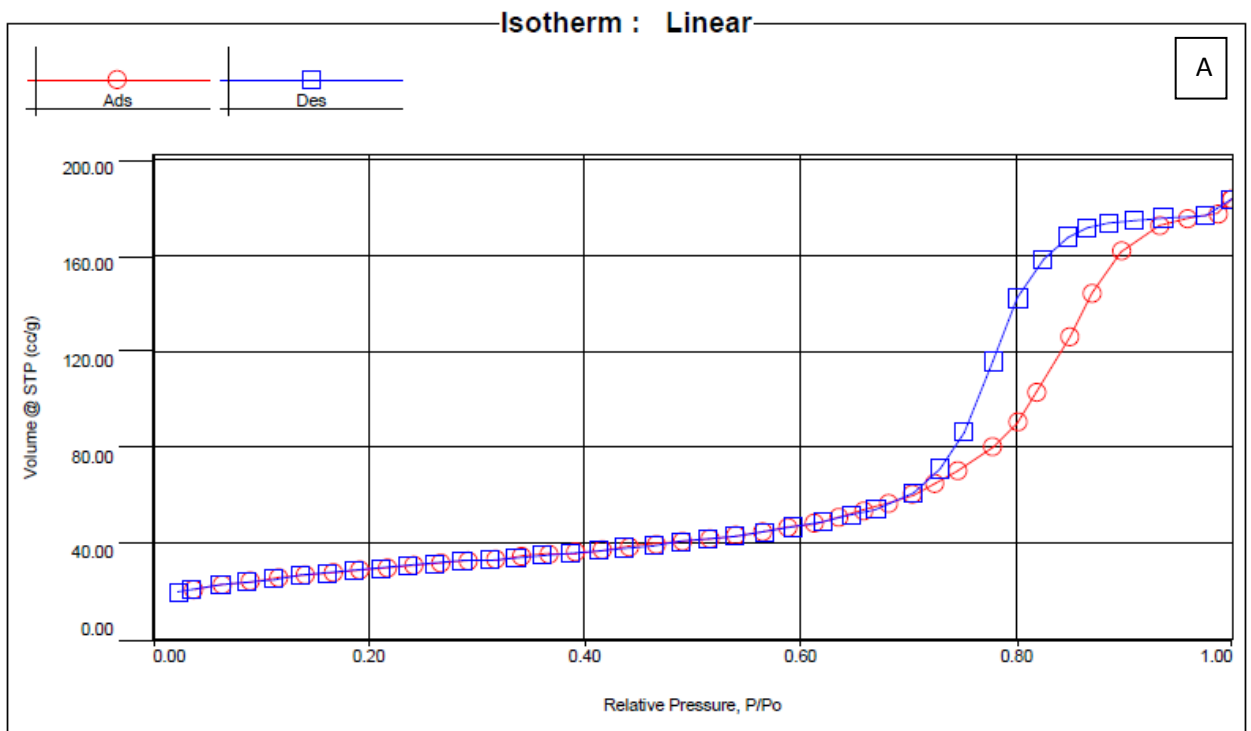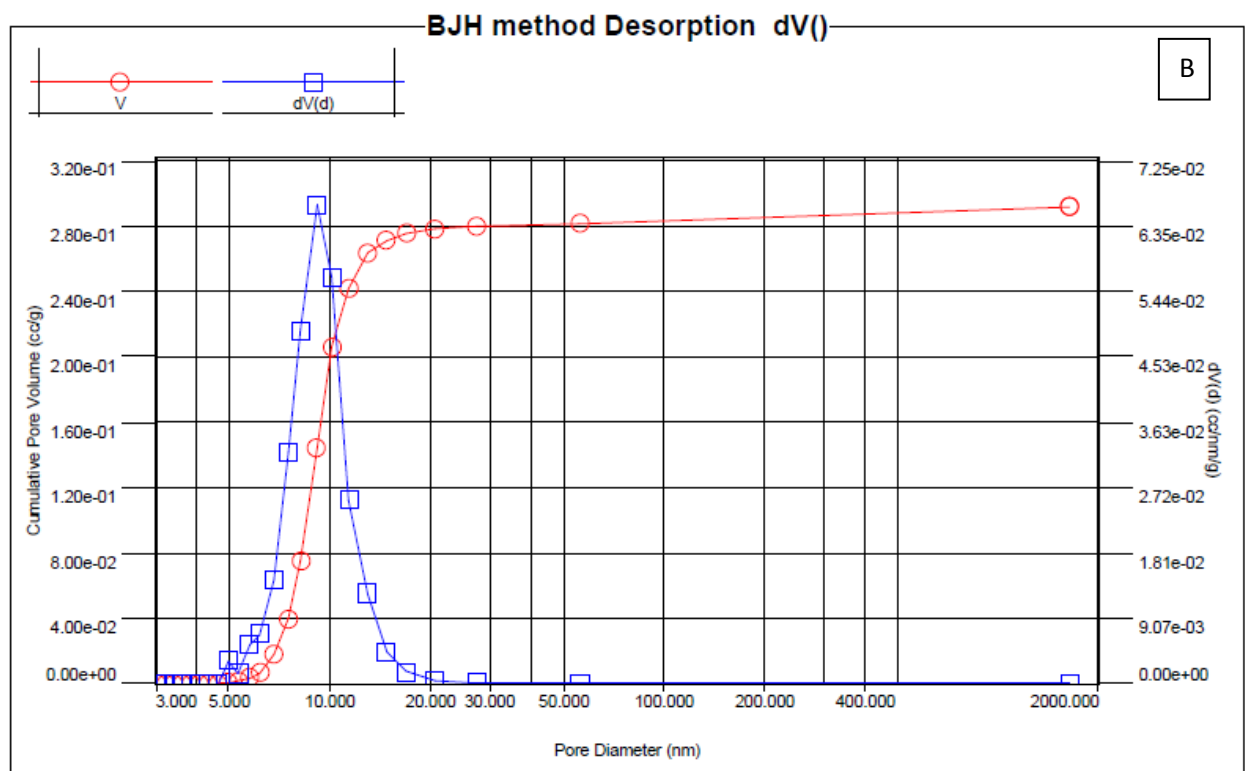

**Figure S5. Nitrogen adsorption-desorption isotherms (A) and BJH pore size distribution (B) curve of PMo- Perlkat**

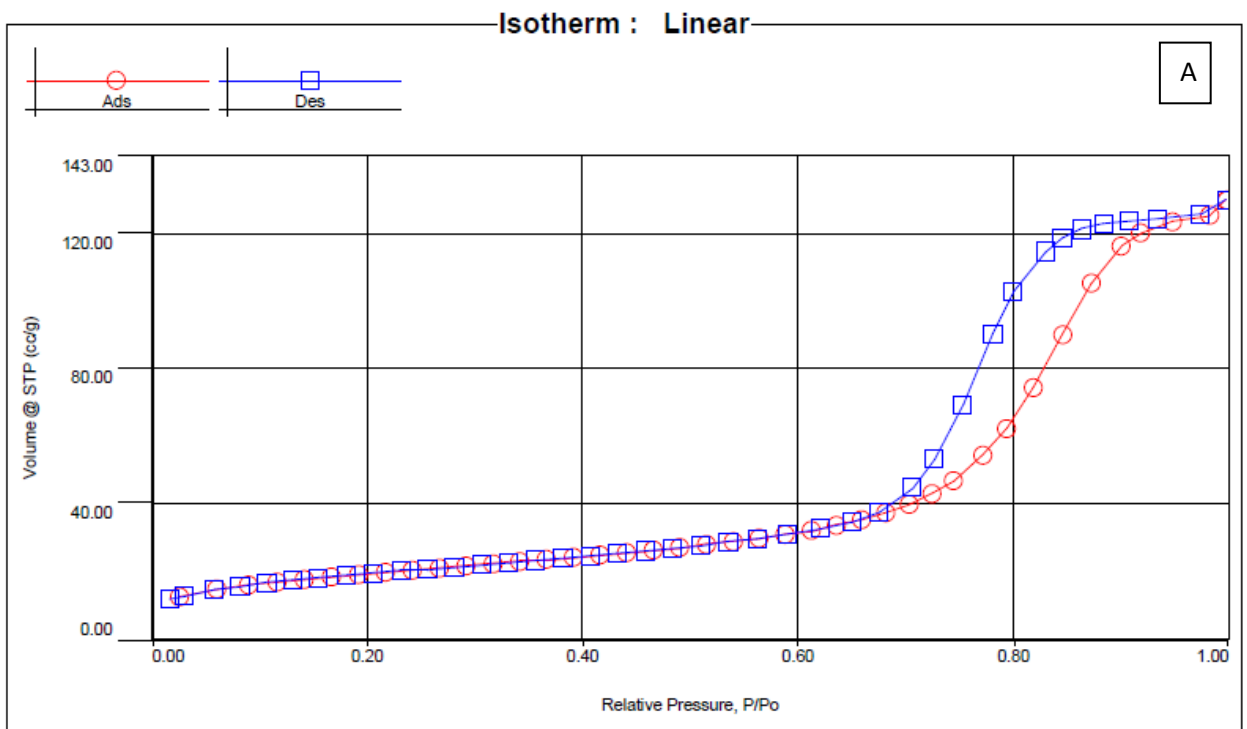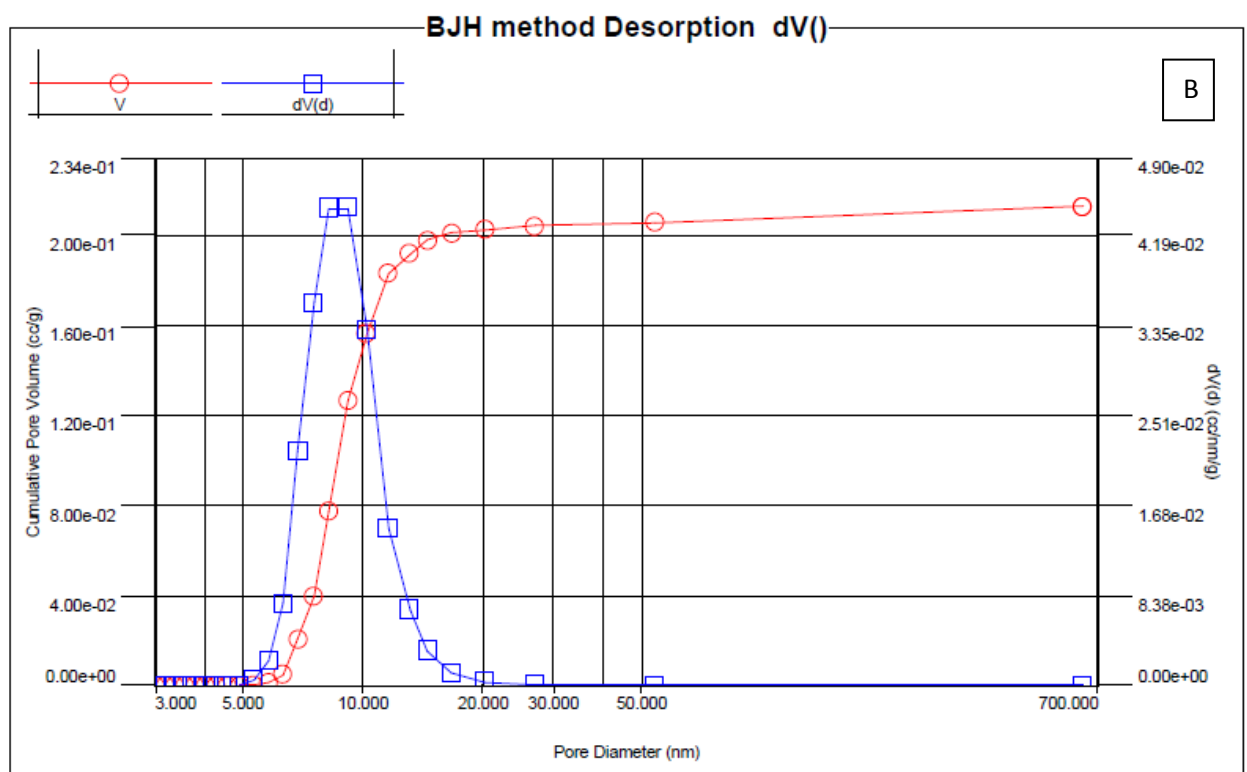

**Figure S6. Nitrogen adsorption-desorption isotherms (A) and BJH pore size distribution (B) curve of PW- Perlkat**

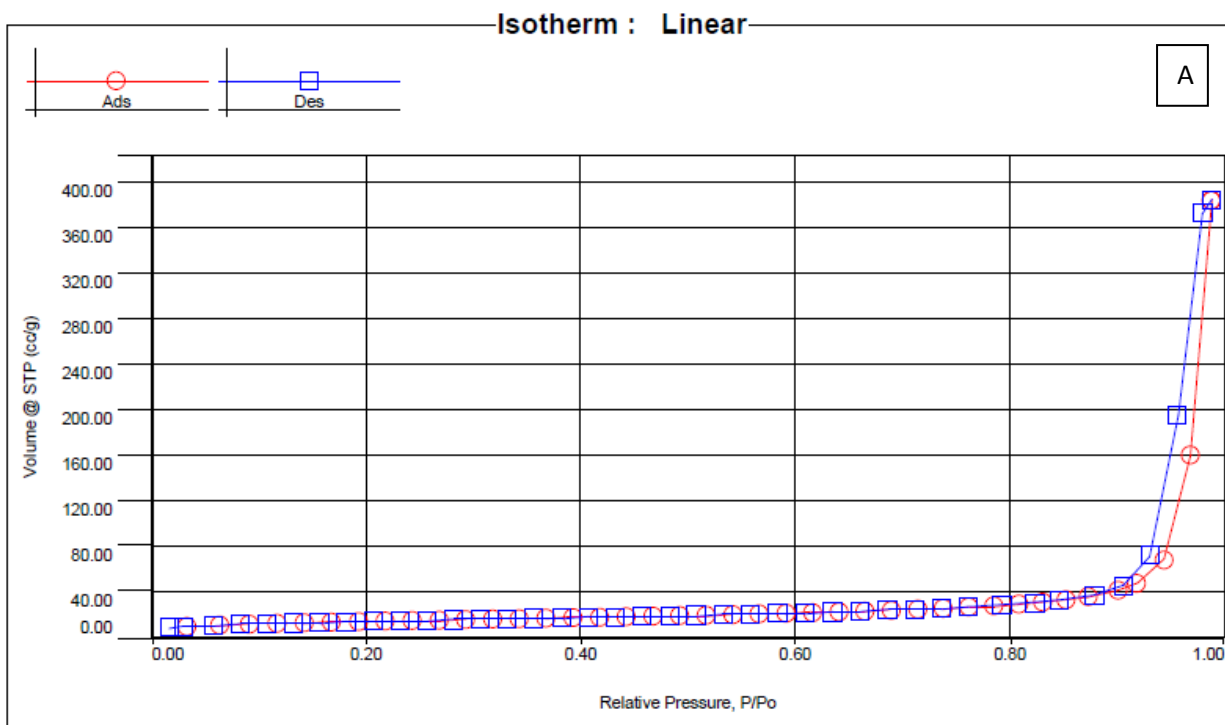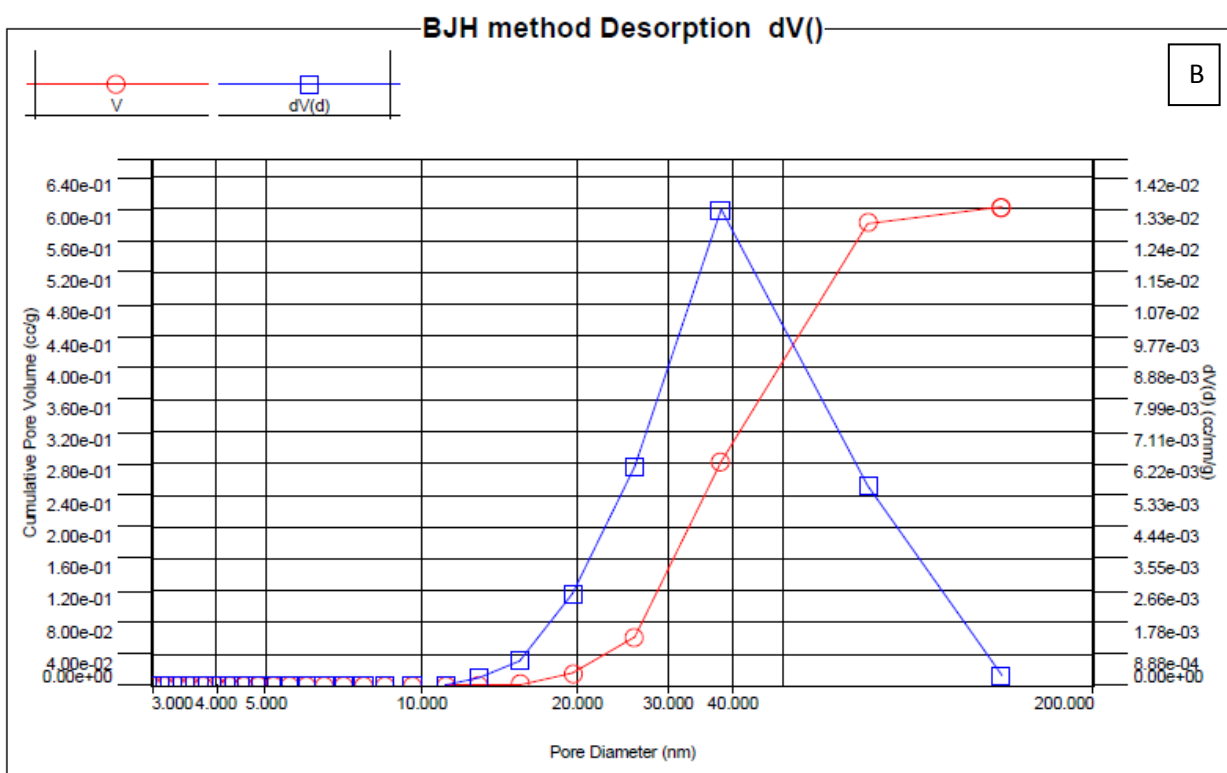

**Figure S7. Nitrogen adsorption-desorption isotherms (A) and BJH pore size distribution (B) curve of PMo- Silochrome**

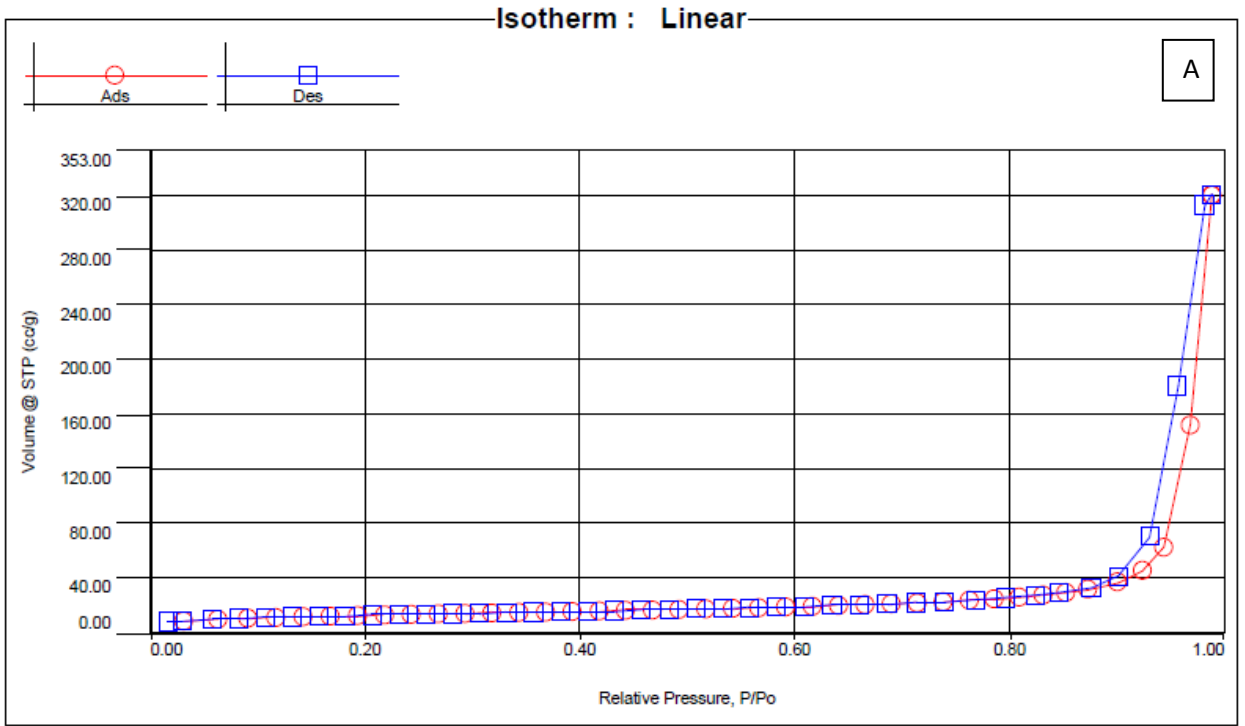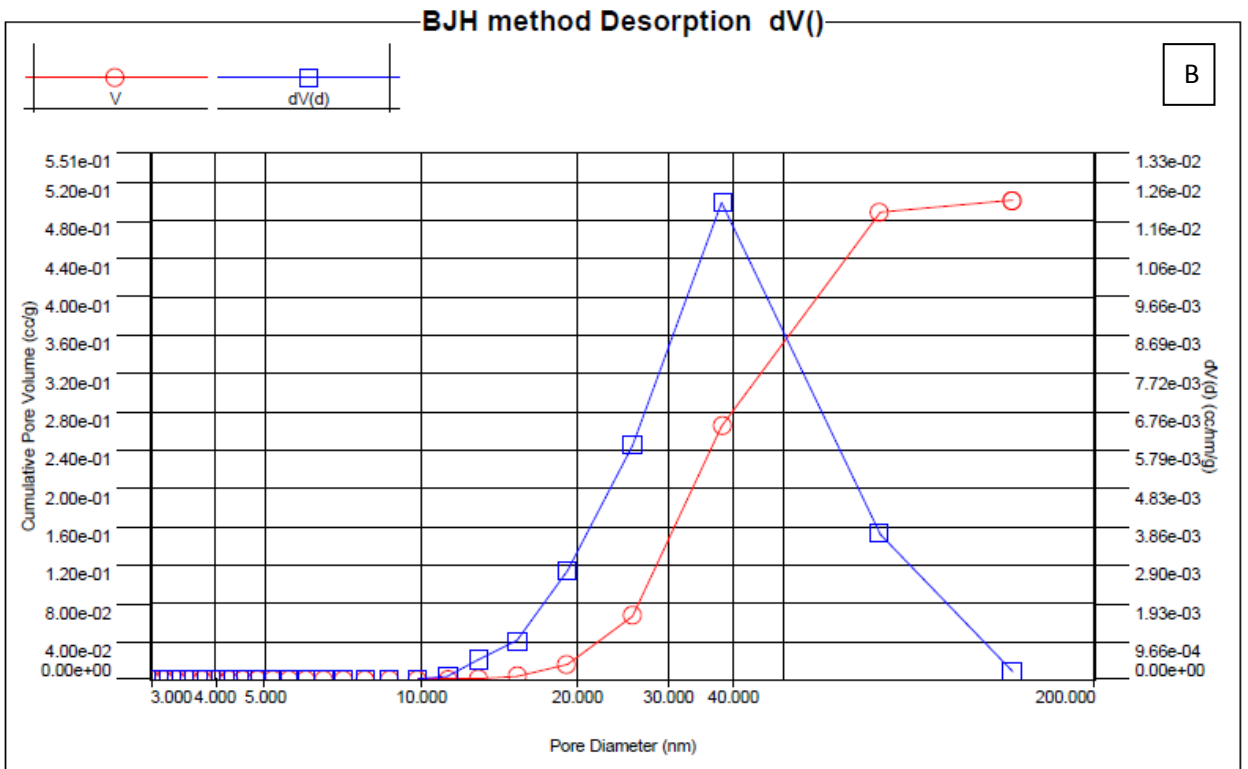

**Figure S8. Nitrogen adsorption-desorption isotherms (A) and BJH pore size distribution (B) curve of PW- Silochrome**



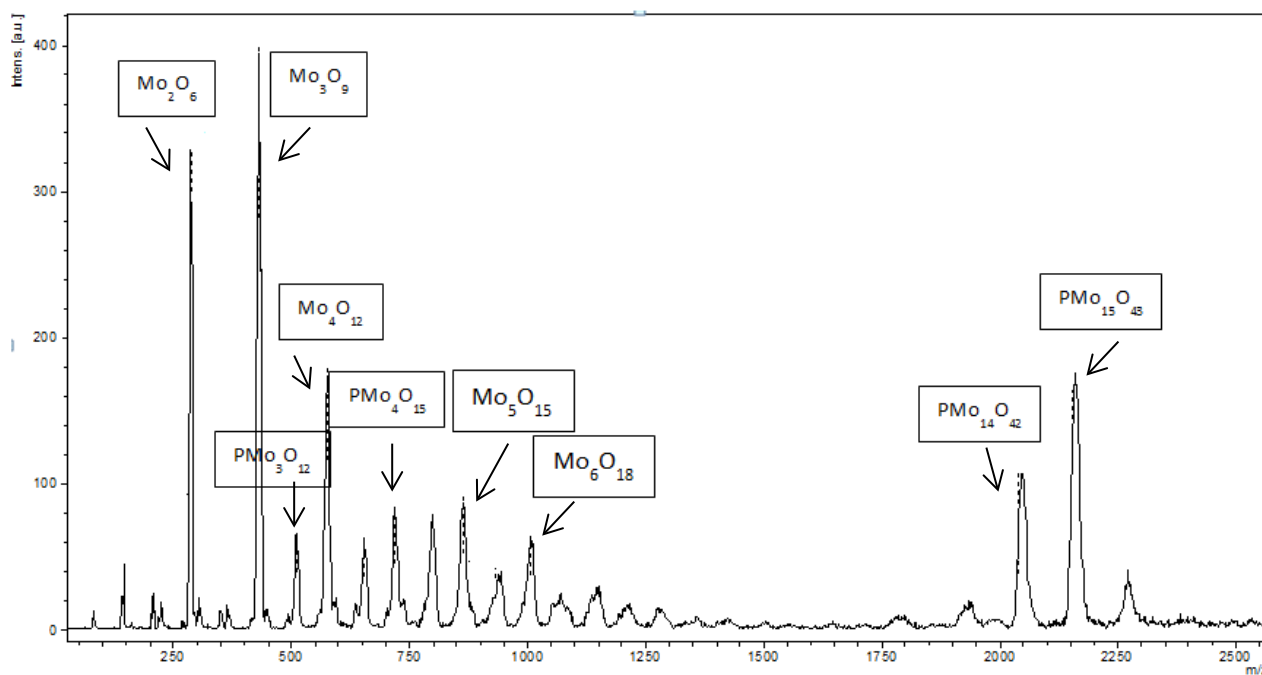

**Figure S9. SALDI mass spectra of PMo-Perlkat catalysts recorder in the negative ion direction mode**

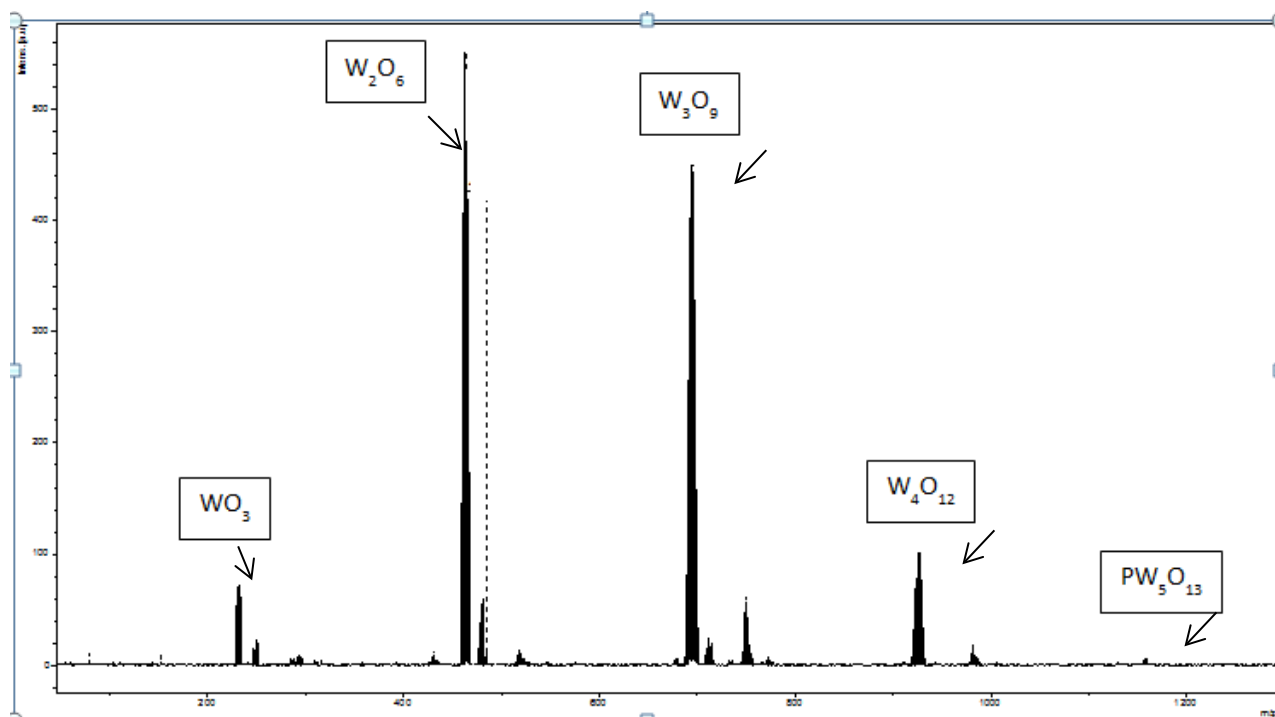

**Figure S10. SALDI mass spectra of PW-Perlkat recorder in the negative ion direction mode**

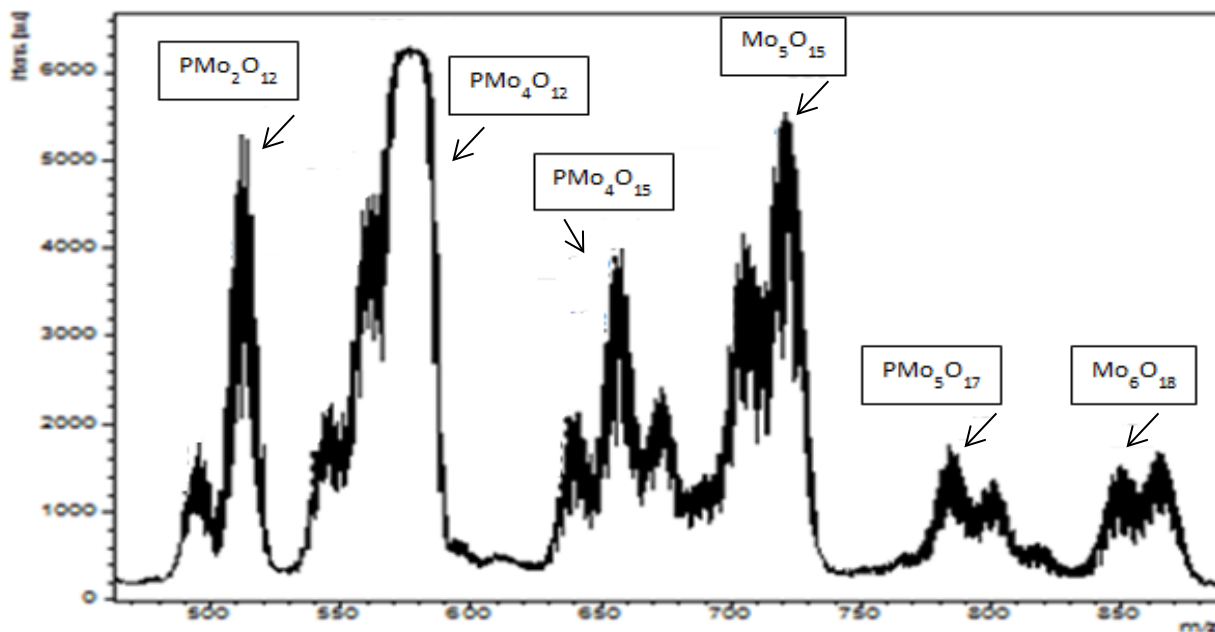

Figure S11. SALDI mass spectra of PMo-silochrome recorder in the negative ion direction mode

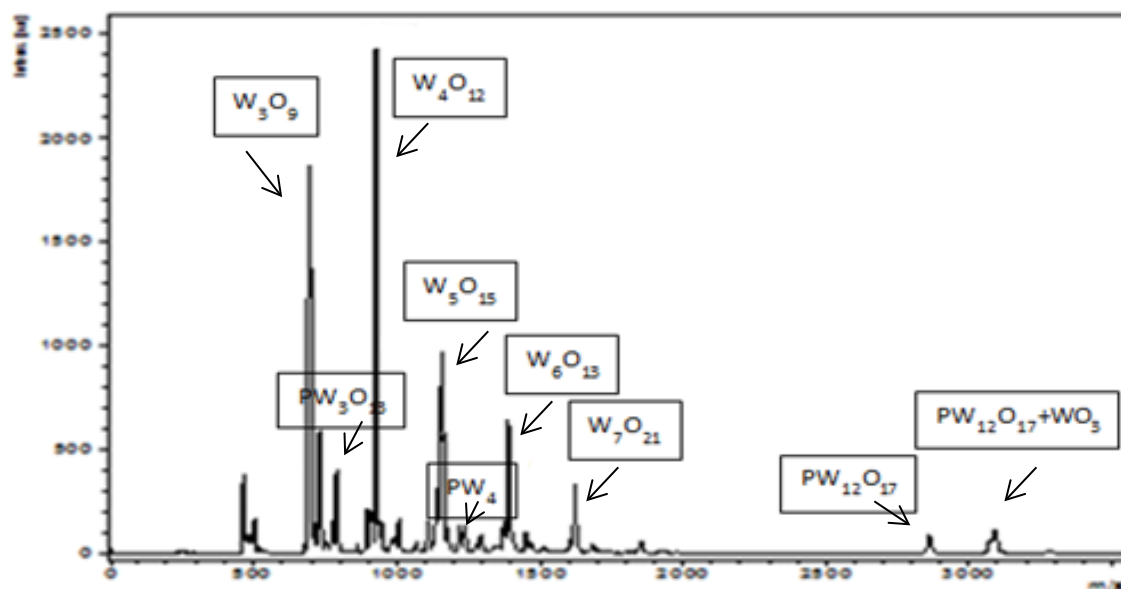

Figure S12. SALDI mass spectra of PW-silochrome recorder in the negative ion direction mode

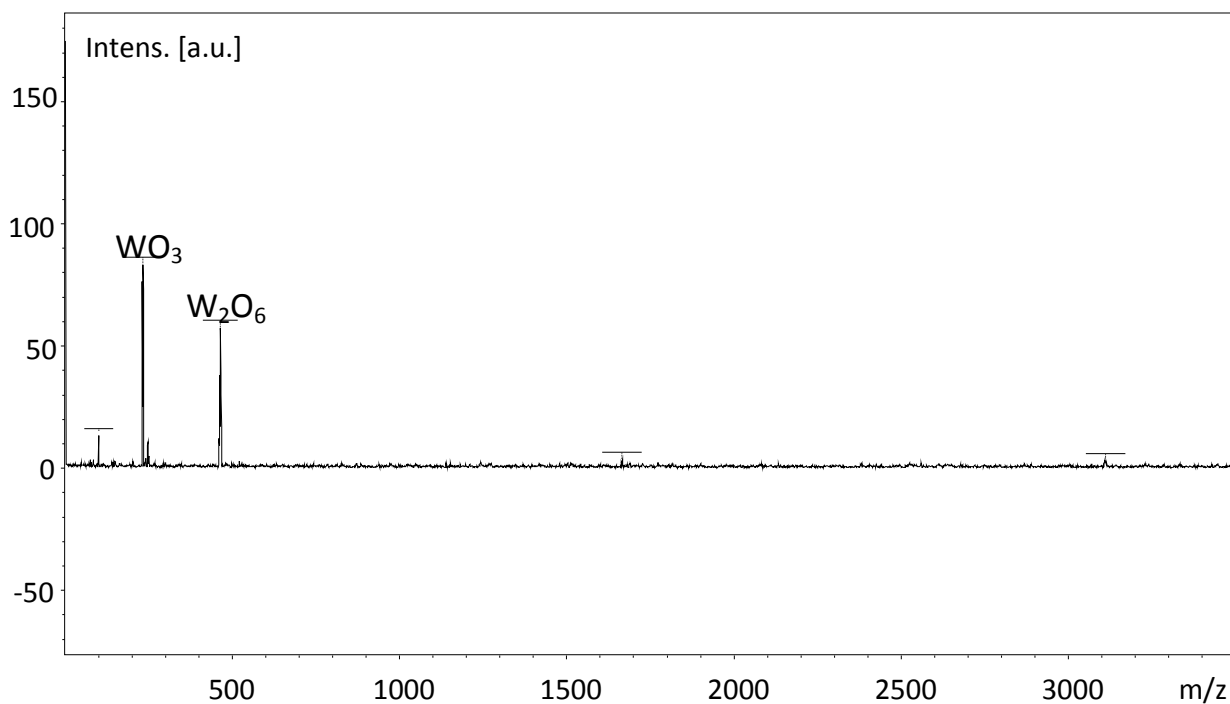

**Figure S13. SALDI mass spectra of PW-acid on Perlkat recorder in the negative ion direction mode**

**Table S1. Sulfur removal from the diesel fuel, the comparison with literature results**

| Substrate   | Initial sulfur content,ppm | Final sulfur content,ppm | Reference           |
|-------------|----------------------------|--------------------------|---------------------|
| Diesel fuel | <b>1080</b>                | 7                        | <i>this article</i> |
|             | 559,7                      | 4,8                      | 1                   |
|             | 746                        | 181,2                    | 2                   |
|             | 659,7                      | 8,62                     | 3                   |
|             | 2300                       | 391                      | 4                   |
|             | 500                        | 6                        | 5                   |

#### References

1. Wang, J.; Zhang, L.; Sun, Y.; Jiang, B.; Chen, Y.; Gao, X.; Yang, H (2018) Deep catalytic oxidative desulfurization of fuels by novel Lewis acidic ionic liquids. *Fuel Process. Technol* 177:81–88.

2. Safa, M., Mokhtarani, B., Mortaheb, H. R., Tabar Heidar, K., Sharifi, A., & Mirzaei, M (2017) Oxidative Desulfurization of Diesel Fuel Using a Brønsted Acidic Ionic Liquid Supported on Silica Gel. *Energy & Fuels* 31:10196–10205.
3. Jiang, B., Yang, H., Zhang, L., Zhang, R., Sun, Y., Huang, Y (2016) Efficient oxidative desulfurization of diesel fuel using amide-based ionic liquids. *Chemical Engineering Journal* 283:89-96.
4. D. Julião, A.C. Gomes, M. Pillinger, R. Valença, J.C. Ribeiro, B. de Castro, I.S. Gonçalves, L. Cunha Silva, S.S. Balula (2016) Zinc-substituted polyoxotungstate@amino- MIL-101(Al) – An efficient catalyst for the sustainable desulfurization of model and real diesels. *Eur. J. Inorg. Chem* 32:5114–5122.
5. Sunder Lal., Deeptiraj Pant (2015) Catalytic Oxidative Desulfurization (ODS) by Using HPA supported Alumina Catalyst. *International Research Journal of Engineering and Technology (IRJET)* 2:1396-1400.
